# Supplementary material for: The programmed site-specific delivery of the angiostatin sunitinib and chemotherapeutic paclitaxel for highly efficient tumor treatment
Source: Royal Society of Chemistry journal article supplement (doi:10.1039/c9tb01159e), 2019-01-01
Supplement: c9tb01159e1.pdf [file c9tb01159e1.pdf]

## Supporting Information

Supplementary information includes experimental details; Synthesis routes of CD-Peptide-SH and mPEG-PLLMA(-Pep-CD)-PAsp(DBP);  $^1\text{H}$  NMR spectra of  $\beta$ -cyclodextrin derivatives and lysine derivatives; size distributions of nanoparticles and drug loading contents of micelles; the cytotoxicity of blank micelles against C6 cells and bEnd3 cells; the statistical apoptosis rate of C6 cells; *in vivo* and *ex vivo* fluorescence imaging of Dir-MC; the weights of mice receiving various treatments; *ex vivo* histological analyses of organs.

Supplementary information accompanies this paper is available free of charge *via* the Internet at <http://pubs.acs.org>.

## Experimental

### Synthesis of mono-6-deoxy-6-tosyl- $\beta$ -cyclodextrin (CD-OTs)

30 g of  $\beta$ -CD (16.5 mmol) was added into NaOH solution (18 g NaOH dissolved in 120 mL water) in ice bath followed by the addition of 6 g p-tolylsulfonyl chloride (6.3 mmol) with vigorous stirring. After 5 h's reaction at 0 °C, the precipitate was removed by filtration. Then 10% HCl was added into the filtrate to adjust the pH value to 7, the mixture was kept in 4 °C overnight. Afterwards, the white solid was recrystallized twice in hot water to obtain 12.5 g of product as a white crystalline powder. (Yield: 39.7%)

$^1\text{H}$  NMR (400 MHz,  $\text{DMSO}-d_6$ ,  $\delta$  ppm): 2.43 ppm (s, 3H, -ArCH<sub>3</sub>), 3.35-3.15 ppm (m, 42H, *HOD* shielded, H<sub>2</sub>, H<sub>3</sub>, H<sub>4</sub>, H<sub>5</sub>, H<sub>6a</sub>, H<sub>6b</sub>), 4.60-4.41 ppm (m, 6H, 6-OH), 4.91-4.75 ppm (m, 7H, H<sub>1</sub>), 5.85-5.65 ppm (m, 14H, 2,3-OH), 7.48 ppm (d, 2H, ArH), 7.79 ppm (d, 2H, ArH).

MALDI-TOF MS:  $m/z$  calculated for  $\text{C}_{49}\text{H}_{76}\text{O}_{37}\text{S}$   $[\text{M} + \text{H}]^+$  1289.17, found:  $[\text{M} + \text{H}]^+$  1289.54 and  $[\text{M} + \text{K}]^+$  1327.36.

### Synthesis of mono-6-N-propargylamino-6-deoxy- $\beta$ -cyclodextrin (CD-Yne)

1.0 g of mono-6-OTs- $\beta$ -CD was reacted with excess amount of propargylamine (124 mg, 2.25 mmol) in 15 mL of DMF at 70 °C for 24 h under N<sub>2</sub> atmosphere. After the reaction was completed, the mixture was cooled down to room temperature, and then 30 mL of cold acetone was added. The precipitates were re-dissolved in 30 mL of a water-methanol mixture solution (1:2 v:v), and washed with 50 mL of acetone for 3 times for the removal of unreacted propargylamine. Then the crude product was recrystallized twice in water and acetonitrile mixture, followed by drying under vacuum to obtain a white powder. (Yield: 27.3%)

<sup>1</sup>H NMR (400 MHz, D<sub>2</sub>O-*d*<sub>2</sub>,  $\delta$  ppm): 1.96 ppm (s, 1H, HC $\equiv$ C-CH<sub>2</sub>NH-), 2.75 ppm (t, 1H, HC $\equiv$ C-CH<sub>2</sub>-), 3.03 ppm (d, 2H, HC $\equiv$ C-CH<sub>2</sub>-), 3.94-3.15 ppm (m, H<sub>2</sub>, H<sub>3</sub>, H<sub>4</sub>, H<sub>5</sub>, H<sub>6a</sub>, H<sub>6b</sub>), 4.91-4.75 ppm (m, 7H, H<sub>1</sub>).

MALDI-TOF MS: m/z calculated for C<sub>45</sub>H<sub>73</sub>NO<sub>34</sub> [M + H]<sup>+</sup> 1172.05, found: [M + Na]<sup>+</sup> 1294.46.

### Synthesis of mono-6-thiol-6-deoxy- $\beta$ -cyclodextrin

5.0 g Mono-6-OTs- $\beta$ -CD (3.9 mmol) and 5.0 g thiourea (66 mmol) were dissolved in 25 mL of 80% aqueous methanol and refluxed for 72 h at 110 °C. The solvent was evaporated and the obtained solid was re-dispersed in 80 mL methanol and stirred vigorously at room temperature for 1 h, then the mixture was filtered and the residue was dissolved in 100 mL 10% NaOH and stirred at 50 °C for 5 h. After reaction, the solution pH value was adjusted to 2 with 1 M HCl followed by adding 17 mL trichloroethylene, the mixture was stirred overnight at room temperature. The product was collected by filtering, vacuum drying, and recrystallizing in water and ethanol. (Yield: 24.8%)

<sup>1</sup>H NMR (400 MHz, DMSO-*d*<sub>6</sub>,  $\delta$  ppm): 2.75 ppm (d, 2H, -CH<sub>2</sub>-SH), 3.35-3.15 ppm (m, 42H, HOD shielded, H<sub>2</sub>, H<sub>3</sub>, H<sub>4</sub>, H<sub>5</sub>, H<sub>6a</sub>, H<sub>6b</sub>), 4.60-4.41 ppm (m, 6H, 6-OH), 4.91-4.75 ppm (m, 7H, H<sub>1</sub>), 5.85-5.65 ppm (m, 14H, 2,3-OH).

### Synthesis of MMP-2 sensitive peptide-cyclodextrin conjugate

100 mg of CD-Yne (0.085 mmol), 20 mg of sodium ascorbate (0.1 mmol) and 50 mg of azide-terminal peptide (0.06 mmol) were added into a 20 mL Schlenk tube, then 5 mL dry DMF was added and purged air through three freeze-thaw cycles using Ar gas

as an inert atmosphere. Then 2.5 mg of  $\text{CuSO}_4 \cdot 5\text{H}_2\text{O}$  (0.01 mmol) was added into the solution and the mixture was stirred at 40 °C for 24 h. After the reaction was terminated by inletting air and adding 200  $\mu\text{L}$  PMDETA, the solution was translated into dialysis bag (MWCO: 500 Da) and dialyzed against deionized water to remove  $\text{Cu}^{2+}$ . Finally, the product was obtained as an off-white powder after freeze-drying. (Yield: 59.5%).

$^1\text{H}$  NMR (400 MHz,  $\text{DMSO}-d_6$ ,  $\delta$  ppm): 0.80-0.92 ppm (m,  $\text{CH}_3$ - of Leu) 1.03-1.59 ppm (m,  $-\text{CH}_2-$  and  $-\text{CH}-$  of peptide and polypeptide), 3.80-3.15 ppm (m,  $\text{HOD}$  shielded,  $\text{H}_2$ ,  $\text{H}_3$ ,  $\text{H}_4$ ,  $\text{H}_5$ ,  $\text{H}_{6a}$ ,  $\text{H}_{6b}$ ), 4.60-4.41 ppm (m, 6H, 6- $\text{OH}$ ), 4.91-4.75 ppm (m, 7H,  $\text{H}_1$ ), 5.85-5.65 ppm (m, 14H, 2,3- $\text{OH}$ ), 4.0-4.5 ppm ( $-\text{CONHCH}-\text{NH}$ ), 7.37 ppm (b, 1H,  $-\text{CH}-$  of triazole).

#### Synthesis of N-(tert-butoxycarbonyl)- $\epsilon$ -methacryloyllysine (MA-Lysine-Boc)

18.6 g of L-Lysine hydrochloride (0.11 mol) and 12.61 g of  $\text{CuSO}_4 \cdot 5\text{H}_2\text{O}$  (0.055 mol) were added into a 500 mL two-neck round bottle containing 200 mL  $\text{H}_2\text{O}$  and refluxed for 2 h at 100 °C. After the solution was cooled to room temperature, the pH value was adjusted to 9 by adding 2 M  $\text{Na}_2\text{CO}_3$  solution. Then 11.0 g of methacryloyl chloride (0.105 mol) and 100 mL NaOH (1 M) were added slowly to the solution in an ice-cold bath. The reaction was stirred overnight in the dark and then the solid was filtrated, washed with deionized water, methanol and diethyl ether sequentially. The obtained solid was re-dispersed in 500 mL deionized water after drying in vacuum, and then 29 g of 8-hydroxyquinoline (0.2 mol) dissolved in  $\text{CHCl}_3$  (300 mL) was added under vigorous stirring. The filtrate was extracted with  $\text{CHCl}_3$  ( $3 \times 200$  mL) to remove the excess 8-hydroxyquinoline. The yellowish aqueous solution was rotary evaporated to about 50 mL and then poured into a large amount of acetone (500 mL) to give a white precipitate. The product was obtained as a white solid after filtrating and vacuum drying. (Yield: 80.3%)

10 g of N-methacryloyllysine (46.7 mmol) was dissolved in 200 mL 1 M  $\text{NaHCO}_3$  aqueous solution and then di-tert-butyl di-carbonate  $(\text{BOC})_2\text{O}$  (13.1 g, 60 mmol) in 20 mL THF was added dropwise. The solution was stirred for 24 h at room temperature and then extracted twice with 50 mL diethyl ether to remove excess  $(\text{BOC})_2\text{O}$ ,

followed by adding 0.2 M  $\text{H}_3\text{PO}_4$  to acidify to pH 4. Then the mixture was washed with 1000 mL ethyl acetate for three times and the organic phase was collected and dried over anhydrous  $\text{Na}_2\text{SO}_4$ , filtrated and concentrated to 50 mL and stored at  $-40^\circ\text{C}$  to recrystallize. The final product was obtained as a white needle crystal or crystalline powder. (Yield: 44.5%)

$^1\text{H}$  NMR (400 MHz,  $\text{DMSO}-d_6$ ,  $\delta$  ppm): 12.34 ppm (s, 1H,  $\text{COOH}$ ), 7.90 ppm (br, 1H,  $-\text{CONH}-$ ), 7.03 ppm (br, 1H,  $(\text{CH}_3)_3\text{CO}-\text{C}(=\text{O})\text{NH}-$ ), 5.62 ppm (s, 1H,  $\text{CH}_2=\text{C}-$ ), 5.30 ppm (s, 1H,  $\text{CH}_2=\text{C}-$ ), 3.83 ppm (m, 2H,  $-\text{CONH}-\text{CH}_2-$ ), 3.08 ppm (m, 2H,  $-\text{CONH}-\text{CH}_2\text{COOH}$ ), 1.84 ppm (s, 3H,  $\text{CH}_2=\text{C}(\text{C})-\text{CH}_3$ ), 1.22-1.71 ppm (m, 15H,  $(\text{CH}_3)_3\text{CO}-\text{C}(=\text{O})\text{NH}-$ ,  $-(\text{CH}_2)_3-$ ).

ESI-MS:  $m/z$  calculated for  $\text{C}_{15}\text{H}_{26}\text{N}_2\text{O}_5$   $[\text{M} + \text{H}]^+$  314.18, found  $[\text{M} + \text{Na}]^+$  338.10.

#### **Synthesis of $\epsilon$ -Methacryloyl-L-Lysine N-Carboxyanhydride (MA-Lysine-NCA)**

Under a nitrogen atmosphere, 4.8 g of MA-Lysine-Boc (15.3 mmol) and 1.54 g of triphosgene (5.2 mmol) were added to 150 mL of dry THF and dry ethyl acetate (1:4 v:v) in a 250 mL flame-dried flask and stirred at  $40^\circ\text{C}$  for 1 h. Then, 1.57 g fresh distilled TEA dissolved in 20 mL ethyl acetate was added dropwise and the reaction was kept stirring at  $40^\circ\text{C}$  overnight. Subsequently, the solution was cooled down to  $-40^\circ\text{C}$  rapidly to terminate the reaction. The  $\text{TEA}\cdot\text{HCl}$  salt was removed by filtrating and the filtrate was washed sequentially with cold diluted HCl (0.05 M) aqueous solution, saturated brine and saturated  $\text{NaHCO}_3$  aqueous solution several times. The organic phase was dried over anhydrous  $\text{MgSO}_4$  and concentrated to a volume of about 20 mL and then poured into 200 mL fresh distilled petroleum ether to give MA-Lysine-NCA as a white solid. (Yield 35.4%).

$^1\text{H}$  NMR (400 MHz,  $\text{DMSO}-d_6$ ,  $\delta$  ppm): 5.24 and 5.59 ppm (ds, 2H,  $-\text{C}(\text{CH}_3)=\text{CH}_2$ ), 4.39 ppm (t, 1H,  $-\text{CH}(\text{C})\text{NH}-$ ), 3.06 ppm (q, 2H,  $-\text{CH}_2\text{NH}-$ ), 1.8 ppm (s, 3H,  $-\text{C}(\text{CH}_3)=\text{CH}_2$ ), 1.2-1.75 ppm (dd, m, 6H,  $-\text{CH}-(\text{CH}_2)_3-$ ), 7.85 ppm, 9.04 ppm (s, 2H,  $-\text{CONH}-$ ).

#### **Synthesis of methoxy-poly(ethylene glycol)-block-poly( $\epsilon$ -methacryloyl-L-lysine) - block-poly( $\beta$ -benzyl-L-aspartate) (mPEG-PLLMA-PBLA)**

Triblock copolymer of mPEG-PLLMA-PBLA was synthesized by sequential ring-

opening polymerization of MA-Lysine-NCA and BLA-NCA. Briefly, 1.25 g of  $m\text{PEG}_{5k}\text{-NH}_2$  (0.25 mmol) was added into a 50 mL flame-dried Schlenk tube and vacuum dried at 70 °C for 2 h. After cooling down to room temperature, 1 g of MA-Lysine-NCA (4.2 mmol) dissolved in 10 mL of anhydrous DMF was then added under  $\text{N}_2$  atmosphere. The reaction was sealed and stirred at 35 °C for 48 h, then 1.25 g of BLA-NCA (5 mmol) in 10 mL of DMF was added under  $\text{N}_2$ . The reaction mixture was stirred at 35 °C for another 48 h before precipitated into excess diethyl ether. The precipitate was then collected by centrifugation and dried under vacuum at room temperature to obtain  $m\text{PEG-PLLMA-PBLA}$ . The polymers were purified by self-assembly in water and dialysis (MWCO: 14 kDa) against a large amount of deionized water to remove small molecules. (Yield: 43.2%,  $M_n = 12000$  Da calculated from  $^1\text{H}$  NMR analysis).

**Synthesis of methoxy-poly(ethylene glycol)-block-poly( $\epsilon$ -methacryloyl-L-lysine) - block-poly( $N,N$ -dibutyl-1,3-propanediamine-L-aspartate) [ $m\text{PEG-PLLMA-PAsp(DBP)}$ ]**

$m\text{PEG-PLLMA-PAsp(DBP)}$  was synthesized by aminolysis of  $m\text{PEG-PLLMA-PBLA}$  with  $N,N$ -dibutyl-1,3-propanediamine (DBP). Briefly, 200 mg of  $m\text{PEG-PLLMA-PBLA}$  (0.017 mmol) and 0.5 mL DBP (2.2 mmol) were dissolved in 15 mL DMF under  $\text{N}_2$ . The reaction mixture was stirred at 35 °C for 12 h before precipitated into diethyl ether for three times. The precipitate was then centrifuged, vacuum dried to obtain product as a slightly yellow solid. (Yield: 63.5%,  $M_n = 13600$  Da calculated from  $^1\text{H}$  NMR analysis)

**Synthesis of MMP-2 substrate peptide conjugated  $\beta$ -cyclodextrin grafted triblock polymers ( $m\text{PEG-PLLMA(-Pep-CD)-PAsp(DBP)}$ )**

The mono-6-peptide conjugated  $\beta$ -cyclodextrin grafted tri-block polymers  $m\text{PEG-PLLMA(-Pep-CD)-PAsp(DBP)}$  was synthesized by thiol-ene “Michael addition” between CD-Peptide-SH and  $m\text{PEG-PLLMA-PAsp(DBP)}$ . Briefly, 590 mg of CD-Peptide-SH (0.3 mmol) and 100 mg of  $m\text{PEG-PLLMA-PAsp(DBP)}$  (8.3  $\mu\text{mol}$ ) were dissolved in 10 mL anhydrous DMF in a 50 mL Schlenk tube and 100  $\mu\text{L}$  dimethylphenylphosphine was added under  $\text{N}_2$  atmosphere. The mixture was sealed

and stirred at 40 °C for 72 h followed by being precipitated in diethyl ether three times and then centrifuged, vacuum dried. The obtained solid was re-dissolved in DMF and added into H<sub>2</sub>O to assemble micelle. The solution was dialyzed (MWCO: 14 kDa) against deionized water, freeze dried to obtain a white powder. (Yield: 33.7%,  $M_n$  = 27600 Da calculated from <sup>1</sup>H NMR analysis)

### **Synthesis of fluorescence labeled $\beta$ -cyclodextrin grafted tri-block polymers (mPEG-PLLMA(-Pep-CD-Cr)-PAsp(DBP))**

The Cr was conjugated to cyclodextrin on the side-chain of polymer. Briefly, under a dry N<sub>2</sub> atmosphere, 5  $\mu$ L of oxalyl chloride (8 mg, 60  $\mu$ mol) and 3 mg of 7-(diethylamino) coumarin-3-carboxylic acid (1.3  $\mu$ mol) were dissolved in 5 mL anhydrous CH<sub>2</sub>Cl<sub>2</sub>, followed by adding 0.5  $\mu$ L of DMF as a catalyst. After 12 h reaction at room temperature, the solvent was evaporated to give 7-(diethylamino)coumarin-3-carboxylic chloride as an orange solid. And then the solid was re-dissolved in 2 mL anhydrous DMF and added to a 5 mL DMF solution containing 25 mg of mPEG-PLLMA(S-Peptide-CD)-PAsp(DBP) (1.2  $\mu$ mol) and 1.5  $\mu$ L TEA (10  $\mu$ mol), the reaction was stirred at 40 °C for 24 h. The final product of mPEG-PLLMA(-Pep-CD-Cr)-PAsp(DBP) was obtained as a red solid after precipitation in diethyl ether for three times, centrifugation and vacuum drying. (Yield 35%)

### **Polymer and micelle characterizations**

<sup>1</sup>H NMR spectra were carried out on a Bruker 400 MHz spectrometer and using D<sub>2</sub>O-*d*<sub>2</sub> & DMSO-*d*<sub>6</sub> as solvents. UV-Vis spectral measurements were recorded using Unico UV-2000 UV-Vis spectrophotometer. The fluorescence spectra were measured on a spectrofluorophotometer (Perkin Elmer Ltd., United Kingdom). The molecular weight distribution of polymers was analyzed using a gel permeation chromatography (GPC) system consisting of a Waters 1515 pump, an Ultrahydrogel™ 500 column, an Ultrahydrogel™ 250 column, and a Waters 2417 differential refractive index detector with PEG as a calibration standard. DMF (HPLC grade) containing LiBr (1.0 g/L) was used as an eluent at a flow rate of 1.0 mL/min. Transmission electron microscopy (TEM) analysis was conducted with a Hitachi model JEM-1400 TEM (Hitachi Co.,

Ltd., Tokyo, Japan) operated at 120 kV. Samples were prepared by drying a drop (5  $\mu$ L, 1 mg/mL) of sample solution on a copper grid coated with amorphous carbon. A small drop of uranyl acetate solution (2 wt% in water) was added to the copper grid to negatively stain the sample for 60 s and then blotted with a filter paper. The grid was finally dried overnight inside a desiccator before TEM observation. The size distribution of micelles was measured by 90Plus/BI-MAS equipment (Brookhaven Instruments Corporation, USA) at 25 °C at a detection angle of 15° and 90°, respectively. The values are the mean of three runs plus standard deviations.

#### **Drug loading content (DLC) determination**

A certain amount of drug-loaded micelle solution was freeze-dried, weighted and then re-dissolved to determine the drug loading content by RP-HPLC analysis. General procedures were as follows, 1 mL of the PTX-loaded micelle solution was lyophilized and re-dissolved in 50  $\mu$ L DMF (HPLC grade), diluted with 0.95 mL of acetonitrile (HPLC grade), and then analyzed and quantitated by reverse-phase high performance liquid chromatography (RP-HPLC).

The calibration curve was acquired with different concentrations of free PTX and sunitinib and used for the drug quantification. The drug loading content (DLC) was calculated by the following formula:

$$\text{Drug loading content (DLC)} = \frac{\text{weight of drug in micelles}}{\text{weight of drug loaded micelles}} \times 100 \%$$

The HPLC analysis was achieved on a Waters 1525 HPLC equipped with a Waters 2489 UV-Vis detector. Drug separation was proceeded on a C<sub>18</sub> Ultimate<sup>®</sup> Column (150  $\times$  4.6 mm, 5  $\mu$ m; Welch, Shanghai, China) at 40 °C. For PTX analysis, a mobile phase consisting of acetonitrile, 0.02 M phosphoric acid/ammonium phosphate buffer (pH = 3) (70:30 v:v) at a flow rate of 1.0 mL/min. The effluents were monitored at 227 nm and quantified by pre-determined calibration curve (PTX concentration 0.5 to 255  $\mu$ g/mL). For sunitinib detection, a mobile phase consisting of acetonitrile and 0.02 M phosphoric acid/ammonium phosphate buffer (pH = 3) (65:35 v:v) at a flow rate of 1.0 mL/min. The effluents were monitored at 270 nm and quantified using the





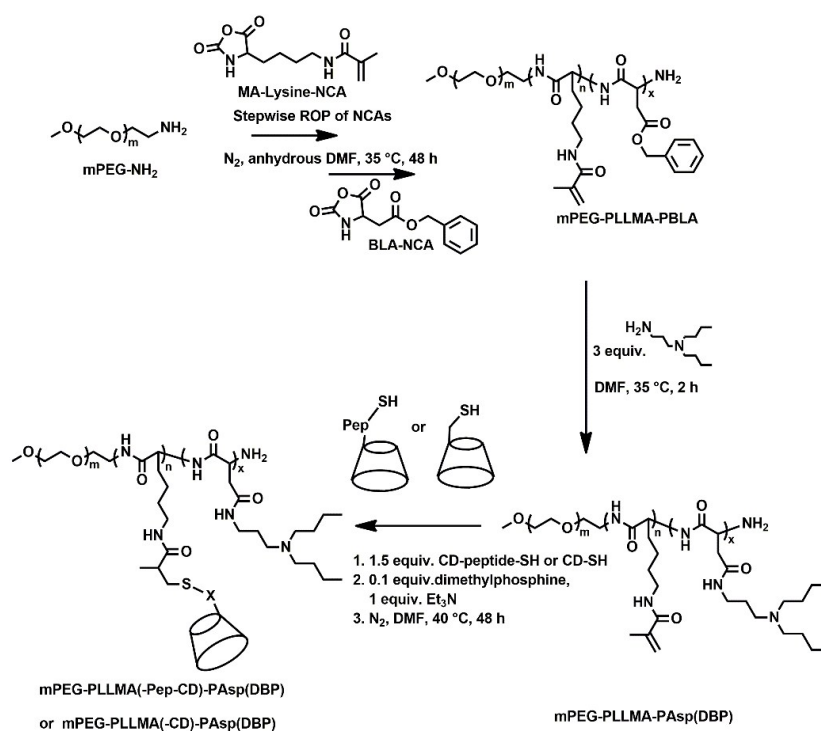

**Scheme S2.** Synthesis of  $\beta$ -cyclodextrin grafted triblock polymers: mPEG-PLLMA(-CD)-PAsp(DBP) and mPEG-PLLMA(-Pep-CD)-PAsp(DBP).

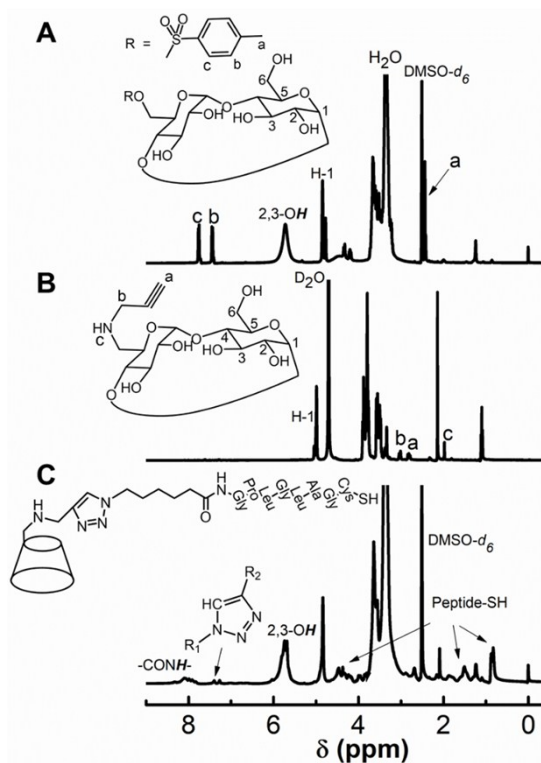

**Fig. S1** <sup>1</sup>H NMR spectra of  $\beta$ -cyclodextrin derivatives: (A) CD-OTs; (B) CD-Yne; (C) CD-Peptide-SH.

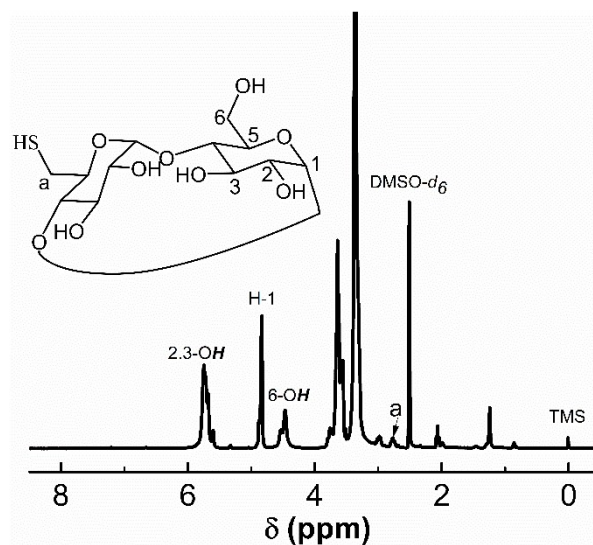

**Fig. S2**  $^1\text{H}$  NMR spectrum of CD-SH.

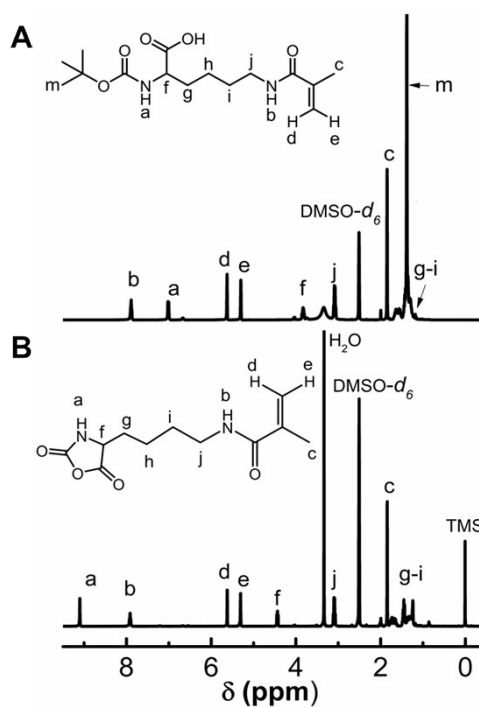

**Fig. S3**  $^1\text{H}$  NMR spectra of lysine derivatives: (A) MA-Lysine (BOC); (B) MA-Lysine-NCA. The BOC characteristic peaks at 1.38 ppm disappeared and meanwhile the peak for NCA ring appeared at 9.04 ppm.

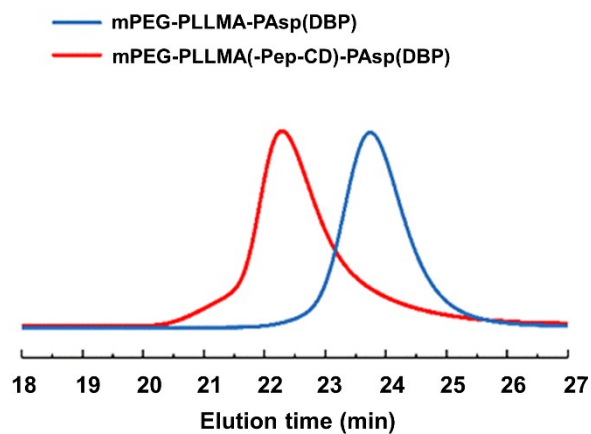

**Fig. S4** GPC traces of mPEG-PLLMA-PAsp(DBP) and mPEG-PLLMA(-Pep-CD)-PAsp(DBP). DMF containing 1 g/L LiBr was used as an eluent at a flow rate of 1.0 mL/min.

**Table S1.** Characteristics of block copolymers.

| Polymer                       | $M_n^a$ (kDa) | $M_n^b$ (kDa) | $M_w/M_n^b$ |
|-------------------------------|---------------|---------------|-------------|
| mPEG-PLLMA                    | 7.9           | 19.0          | 1.20        |
| mPEG-PLLMA-PBLA               | 12.0          | 24.0          | 1.23        |
| mPEG-PLLMA-PAsp(DBP)          | 13.6          | 26.9          | 1.20        |
| mPEG-PLLMA(-Pep-CD)-PAsp(DBP) | 27.6          | 34.5          | 1.21        |

<sup>a</sup>calculated by <sup>1</sup>H NMR; <sup>b</sup>detected by GPC.

**Table S2.** Size distributions of nanoparticles

| Nanoparticles          | Size (determined by DLS) | PDI <sup>a</sup> |
|------------------------|--------------------------|------------------|
| psMC                   | 94.4 ± 17.4 nm           | 0.143            |
| PTX-psMC               | 101.7 ± 15.2 nm          | 0.134            |
| Sunit-psMC             | 123.6 ± 23.5 nm          | 0.175            |
| PTX-Sunit-psMC         | 183 ± 34.7 nm            | 0.242            |
| Sunit-psMC + MMP-2     | 51.5 ± 8.2 nm            | 0.407            |
| PTX-Sunit-psMC + MMP-2 | 60.3 ± 10.1 nm           | 0.167            |
| MC                     | 130.5 ± 25.5 nm          | 0.136            |
| PTX-MC                 | 136.0 ± 28.5 nm          | 0.158            |
| Sunit-MC               | 150.0 ± 47.5 nm          | 0.299            |
| PTX-Sunit-MC           | 157.9 ± 32.1 nm          | 0.180            |

a. Polydispersity index.

**Table S3.** The highest drug loading contents of micelles

| Nanoparticles  | Sunitinib loading content (%) | PTX loading content (%) |
|----------------|-------------------------------|-------------------------|
| PTX-MC         | --                            | 5.1 ± 0.1               |
| Sunit-psMC     | 1.6 ± 0.1                     | --                      |
| PTX-Sunit-MC   | 1.27 ± 0.2                    | 5.17 ± 0.1              |
| PTX-Sunit-psMC | 1.12 ± 0.1                    | 5.34 ± 0.1              |

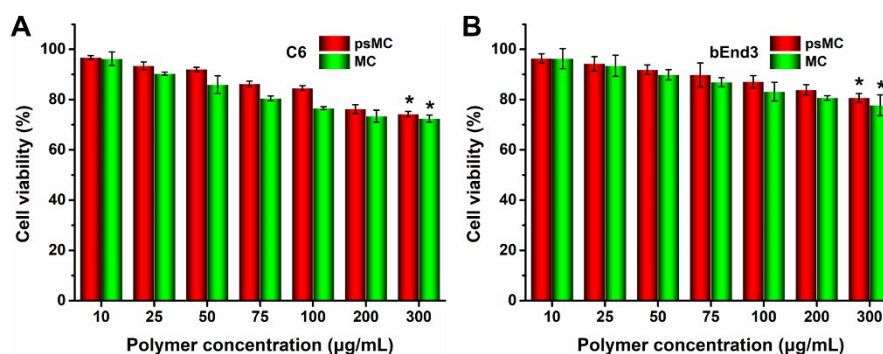

**Fig. S5** The cell viabilities of C6 cells (A) and bEnd3 cells (B) after receiving the treatment of psMC and MC at various polymer concentration. \* $P < 0.05$  compared with 10 µg/mL. No significance differences were found between psMC and MC at the same polymer concentration.

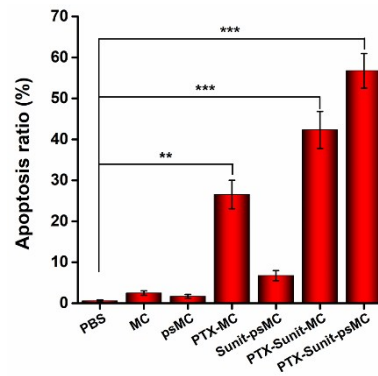

**Fig. S6** The statistical analysis of apoptosis rate after C6 cell receiving the treatments of PBS, MC, psMC, Sunit-psMC, PTX-MC, PTX-Sunit-MC and PTX-Sunit-psMC.  $**P < 0.01$ ,  $***P < 0.001$ .

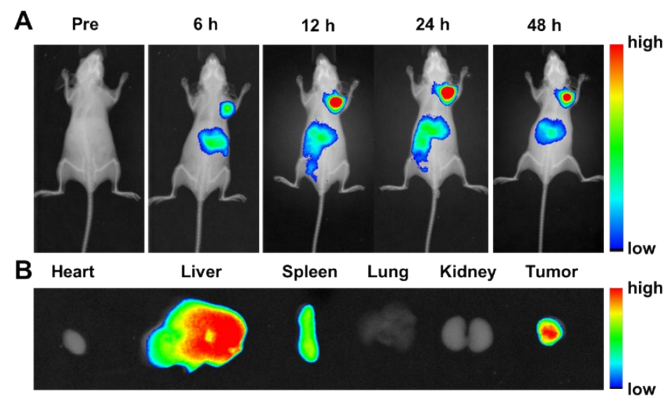

**Fig. S7** (A) Typical *in vivo* Dir fluorescence images at different time points after tail vein injection of Dir-MC and (B) *ex vivo* Dir fluorescence images of the organs excised at 48 h post-injection time from the same animal.

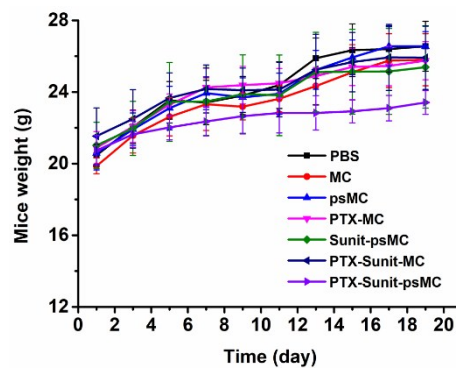

**Fig. S8** The weights of mice receiving various treatments. Mice weight were measured every 2 days ( $n = 6$ ). PTX dose: 500  $\mu\text{g/kg}$  body weight; sunitinib dose: 340

$\mu\text{g/kg}$  body weight.

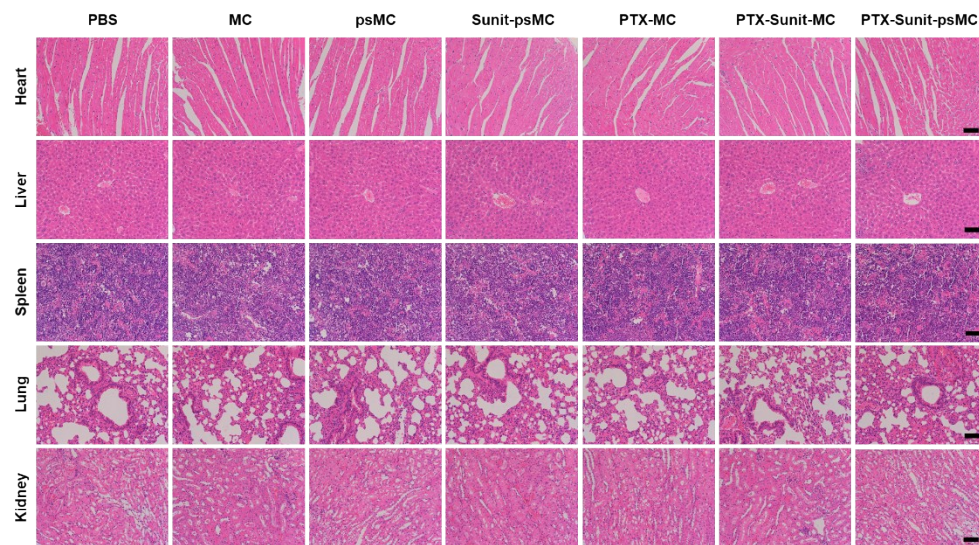

**Fig. S9** *Ex vivo* histological analyses of organs excised from animals of different treatment groups at 19 days after the first treatment. Scale bars represented 50  $\mu\text{m}$ .
